# Supplementary material for: Microbial and inflammatory‐based salivary biomarkers of head and neck squamous cell carcinoma
Source: PubMed Central journal article supplement (PMC6305924; doi:10.1002/cre2.139), 2018-11-28
Supplement: CRE2-4-255-s002.pdf [file CRE2-4-255-s002.pdf]

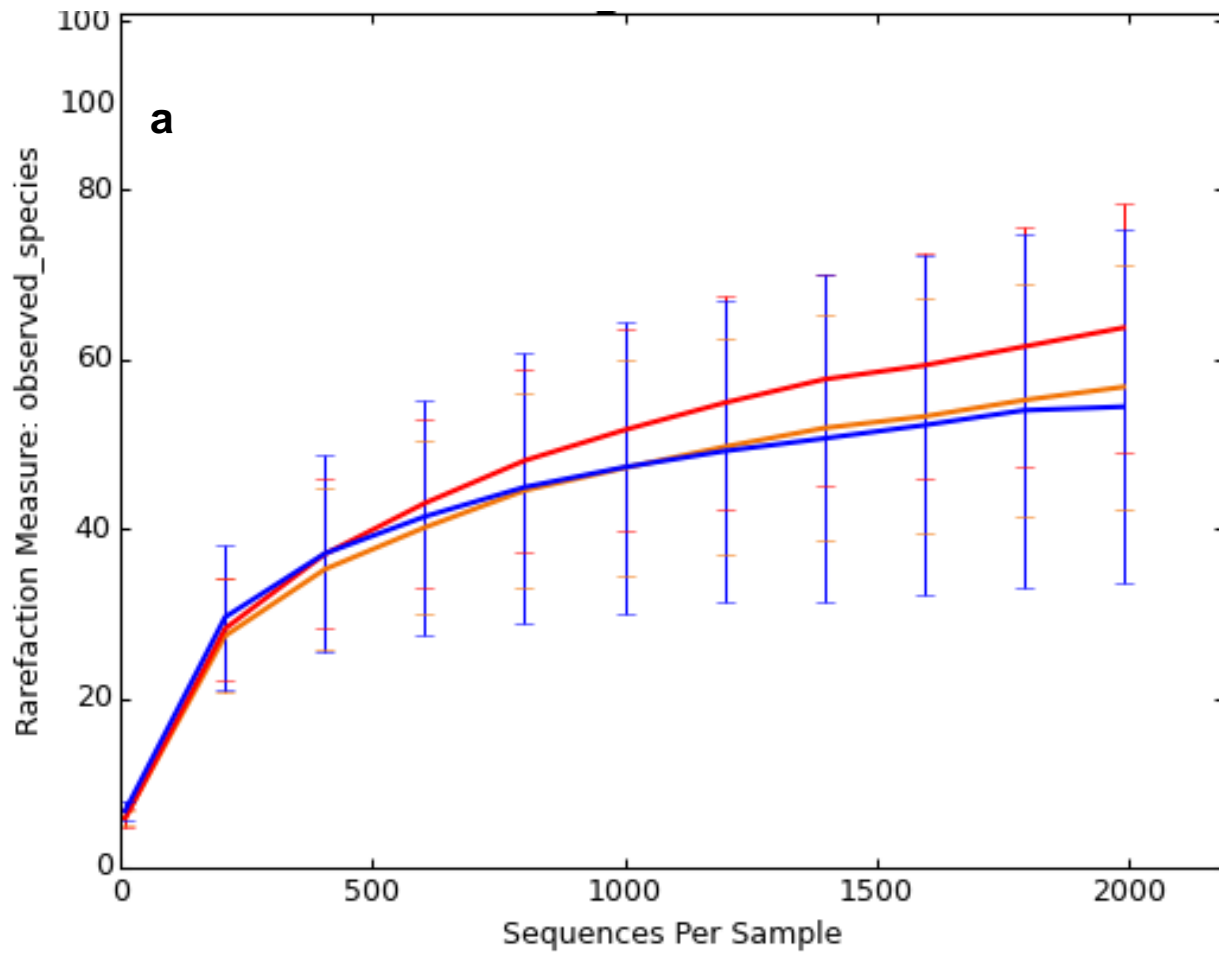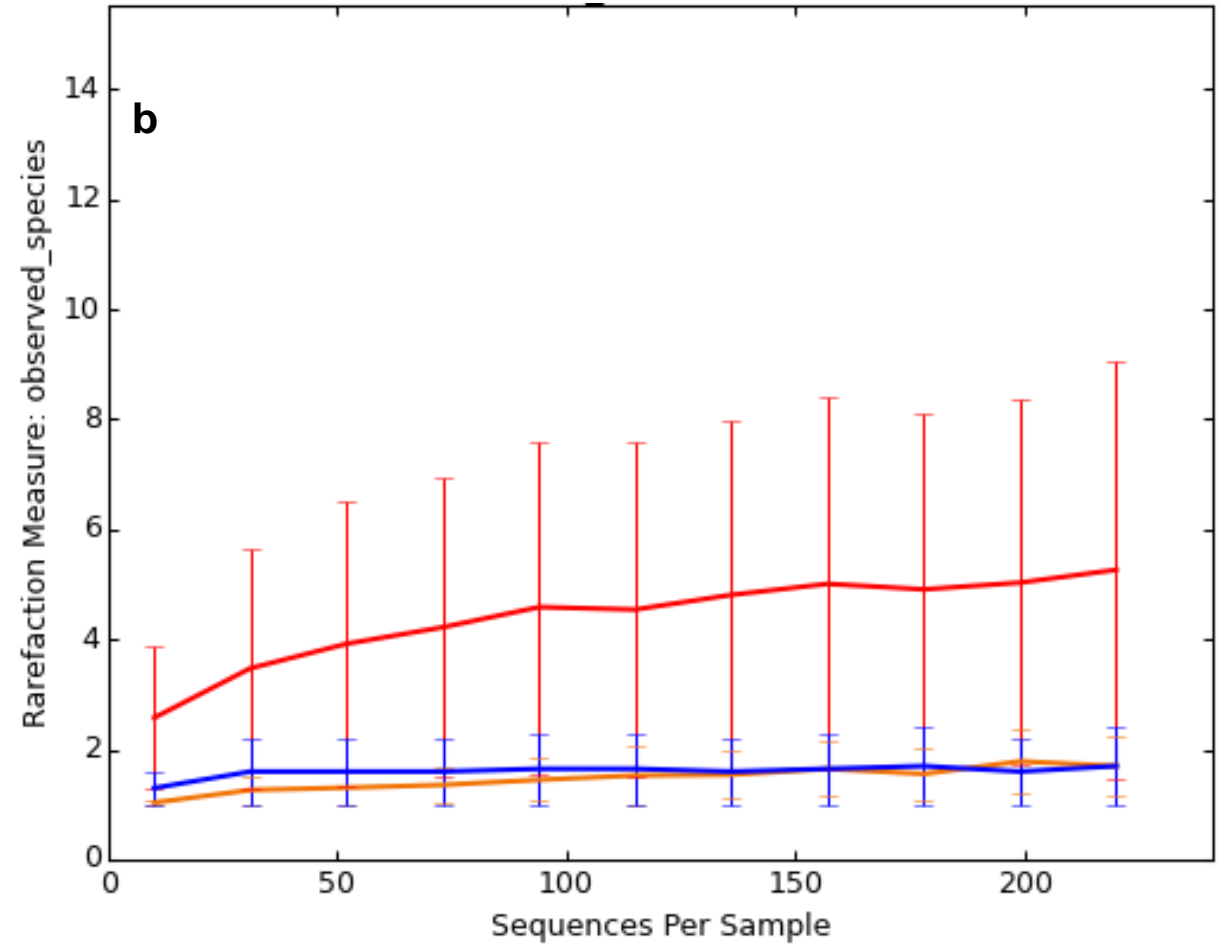

■ Dentally compromised ■ Healthy ■ HNSCC

**Supplementary 2.** Alpha rarefaction analysis plots demonstrating the number of ‘observed species’ in saliva by disease group as a function of sequences per sample for (a) bacterial observed species and (b) fungal observed species.
