# Supplementary material for: Microbial and inflammatory‐based salivary biomarkers of head and neck squamous cell carcinoma
Source: PubMed Central journal article supplement (PMC6305924; doi:10.1002/cre2.139), 2018-11-28

**Supplementary 3.** Differential relative abundances of bacterial genera associated with disease class through LEfSe analysis: (a) *Actinomyces*; (b) *Fusobacterium*; (c) *Treponema*. Mean and median relative abundances for each disease class are indicated by the solid and dashed lines, respectively.

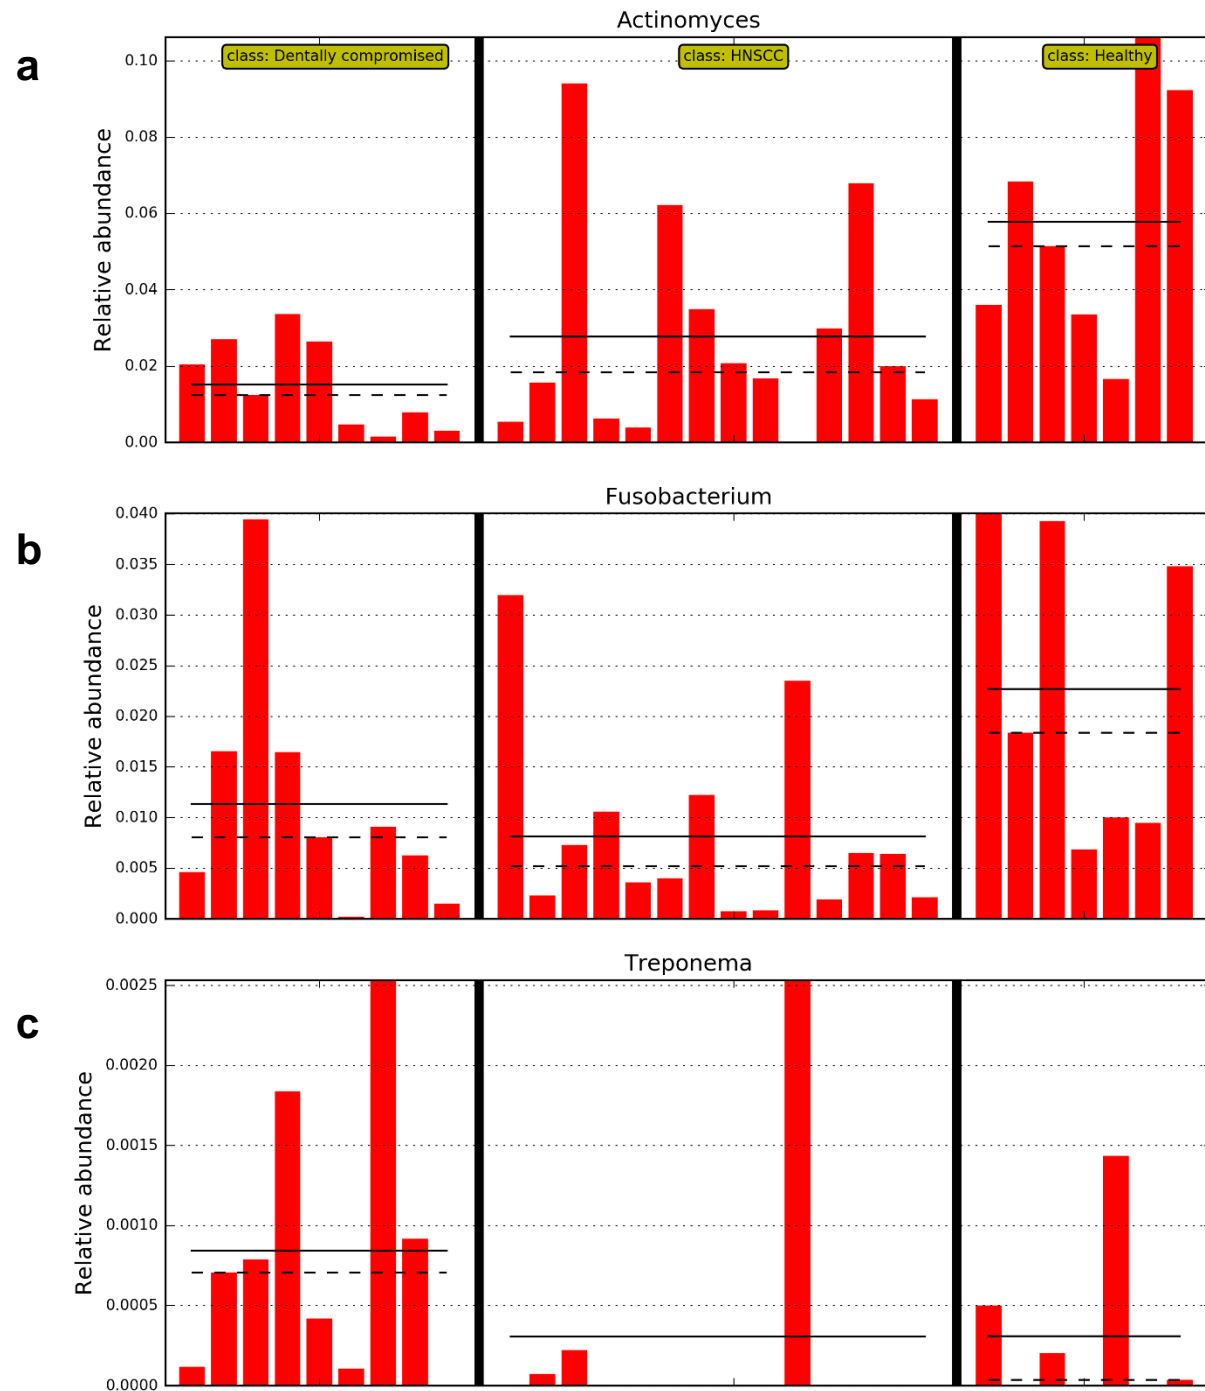

Supplement: CRE2-4-255-s003.pdf [file CRE2-4-255-s003.pdf]
